# Supplementary material for: Identification of Epitopes on Rhinovirus 89 Capsid Proteins Capable of Inducing Neutralizing Antibodies
Source: MDPI journal article supplement (doi:10.3390/ijms23095113), 2022-05-04
Supplement: s1 [file s1]

**Table S1.** Recombinant VP1- and VP2-derived fragments and synthetic peptides of RV89.

| Antigen    | Amino Acid Sequence                                                                                      | Position | Length (aa) | MW (Da) |
|------------|----------------------------------------------------------------------------------------------------------|----------|-------------|---------|
| 89VP1-PI   | NPVENYIDSVLNEVLVVPNIQPSTSVSSHAAPALDAAETGHTSSVQPEDMIETRY<br>VITDQTRDETSIESFLGRSGCIAMIEFNTSSDKTEHDKIGKGFKT | 1-100    | 100         | 10870   |
| 89VP1-PII  | WKISLQEMAQIRRKYEFTYTRFDSEITIVTAAAAQGDDSGHIVLQFMYV<br>PPGAPVPEKRDDYTWQSGTNASVFWQEGQPYPRFTIPFMSIASAYYMFYD  | 101-200  | 100         | 11636   |
| 89VP1-PIII | GYDGDASAASKYGSVVTNDMGTCVRIVTSNQKHDLNIVCRIYHKAKHIKAW<br>CPRPPRAVAYQHTHSTNYIPSNGEATTQIKTRPDVFTGTNV         | 201-293  | 92          | 10174   |
| 89VP1-p1   | NPVENYIDSVLNEVLVVPNIQPSTSVSSHAAPAC                                                                       | 1-33     | 34          | 3564    |
| 89VP1-p2   | LDAAETGHTSSVQPEDMIETRYVITDQTRDETS                                                                        | 34-66    | 34          | 3800    |
| 89VP1-p3   | IESFLGRSGCIAMIEFNTSSDKTEHDKIGKGFKTWKISLQEMC                                                              | 67-108   | 43          | 4867    |
| 89VP1-p4   | WKISLQEMAQIRRKYEFTYTRFDSEITIVTAAC                                                                        | 101-133  | 34          | 4112    |
| 89VP1-p5   | AAAQGDDSGHIVLQFMYVPPGAPVPEKRDDYTWQSGTNASVFC                                                              | 133-174  | 43          | 4627    |
| 89VP1-p6   | SGTNASVFWQEGQPYPRFTIPFMSIASAYYMFYDC                                                                      | 167-200  | 35          | 4076    |
| 89VP1-p7   | ASAYYMFYDGYDGDASAASKYGSVVTNDMGTCVRIVTSNQKHC                                                              | 192-233  | 43          | 4690    |
| 89VP1-p8   | DLNIVCRIYHKAKHIKAWCPRPPRAVAYQHTHSC                                                                       | 234-266  | 34          | 4013    |
| 89VP1-p9   | TNYIPSNGEATTQIKTRPDVFTGTNV                                                                               | 267-292  | 27          | 2928    |
| 89VP2-PI   | SPTVEACGYSRDLIQITRGDSTITSQDTANAVVAYGVWPSYLTTPDDATAIDK<br>PTQPDTSNRFTLDSRSWTSASGWWWKLPDALKNMG             | 1-89     | 89          | 9805    |
| 89VP2-PII  | IFGENMFYHFLGRSGYTIHVQCNSKFHQGLLIVAAIPEHQLASATSGNVSV<br>GYNHHTHPGEQGREVVPSRTSSDNKRPSDDSWLNFDGTL           | 90-179   | 90          | 9917    |
| 89VP2-PIII | LGNLPIYPHQYINLRTNNSATLILPYVNAVPMDSMLRHNWNSLVIIPICPLQ<br>VQPGGTQSIPITVSISPMFSEFSGPRSKVVFSTTQ              | 180-267  | 87          | 9623    |
| 89VP2-p1   | <u>SPTVEACGYSRDLIQITRGD</u>                                                                              | 1-20     | 20          | 2181    |
| 89VP2-p2   | <u>ITRGDSTITSQDTANAVVAY</u>                                                                              | 16-35    | 20          | 2083    |
| 89VP2-p3   | <u>AVVAYGVWPSYLTTPDDATAI</u>                                                                             | 31-50    | 20          | 2109    |
| 89VP2-p4   | <u>DATAIDKPTQPDTSNRFTY</u>                                                                               | 46-65    | 20          | 2228    |
| 89VP2-p5   | <u>NRFTLDSRSWTSASGWWW</u>                                                                                | 61-80    | 20          | 2494    |
| 89VP2-p6   | <u>SGWWWKLPDALKNMGIFGEN</u>                                                                              | 76-95    | 20          | 2350    |
| 89VP2-p7   | <u>IFGENMFYHFLGRSGYTIHV</u>                                                                              | 91-110   | 20          | 2389    |
| 89VP2-p8   | <u>YTIHVQCNSKFHQGLLIVA</u>                                                                               | 106-125  | 20          | 2259    |
| 89VP2-p9   | <u>LLIVAAIPEHQLASATSGNV</u>                                                                              | 121-140  | 20          | 2004    |
| 89VP2-p10  | <u>TSGNVSVGYNHHTHPGEQGRE</u>                                                                             | 136-155  | 20          | 2126    |
| 89VP2-p11  | <u>EQGREVVPSRTSSDNKRPSD</u>                                                                              | 151-170  | 20          | 2244    |
| 89VP2-p12  | <u>KRPSDDSWLNFDGTLGNLPI</u>                                                                              | 166-186  | 21          | 2359    |
| 89VP2-p13  | <u>GNLPIYPHQYINLRTNNSAT</u>                                                                              | 182-201  | 20          | 2287    |
| 89VP2-p14  | <u>NNSATLILPYVNAVPMDSMLR</u>                                                                             | 197-217  | 21          | 2320    |
| 89VP2-p15  | <u>DSMLRHNWNSLVIIPICPLQ</u>                                                                              | 213-233  | 21          | 2449    |
| 89VP2-p16  | <u>CPLOVQPGGTQSIPITVSIS</u>                                                                              | 229-248  | 20          | 2025    |
| 89VP2-p17  | <u>TVSISPMFSEFSGPRSKVVFSTTQ</u>                                                                          | 244-267  | 24          | 2620    |

Position: denotes the corresponding region of the native VP1/VP2 proteins. Length: indicates the number of amino acids. Underlined amino acids denote overlapping sequences between peptides.

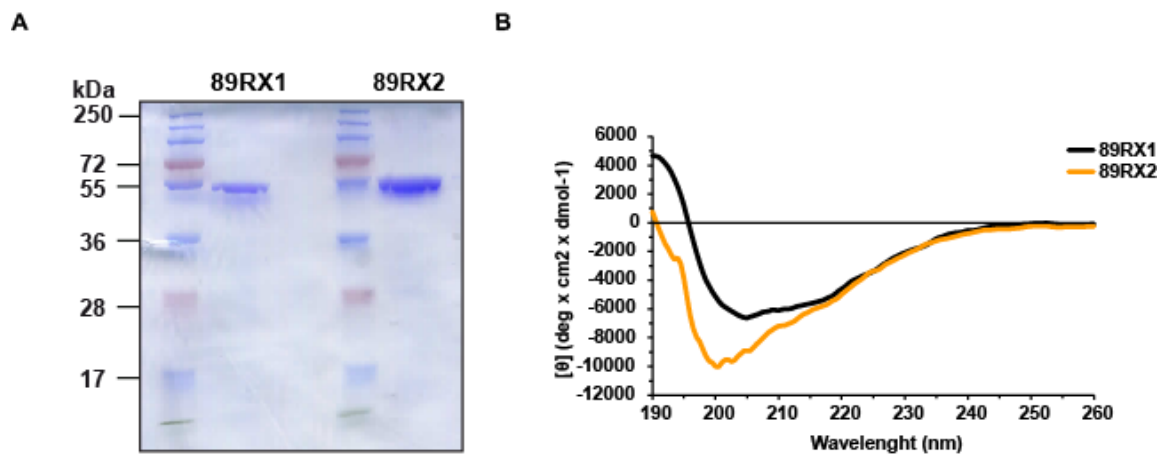

**Figure S1.** Purification and characterization of 89RX1 and 89RX2. (A) Coomassie-stained gel containing purified 89RX1 and 89RX2. Molecular weights (kDa) are indicated on the left margin. (B) Far-UV CD analysis of the purified PreS-based fusion proteins (i.e., 89RX1: black line; 89RX2: orange line). The spectra were recorded at 25°C and are expressed as mean residue ellipticities ( $\theta$ , y-axis) at given wavelengths (nm, x-axis).
